# Supplementary material
Source: MDPI journal article supplement (https://www.mdpi.com/1424-8247/14/5/422)
Supplement: s1 [file s1]

# <sup>1</sup>H and <sup>13</sup>C NMR spectra for compound 2

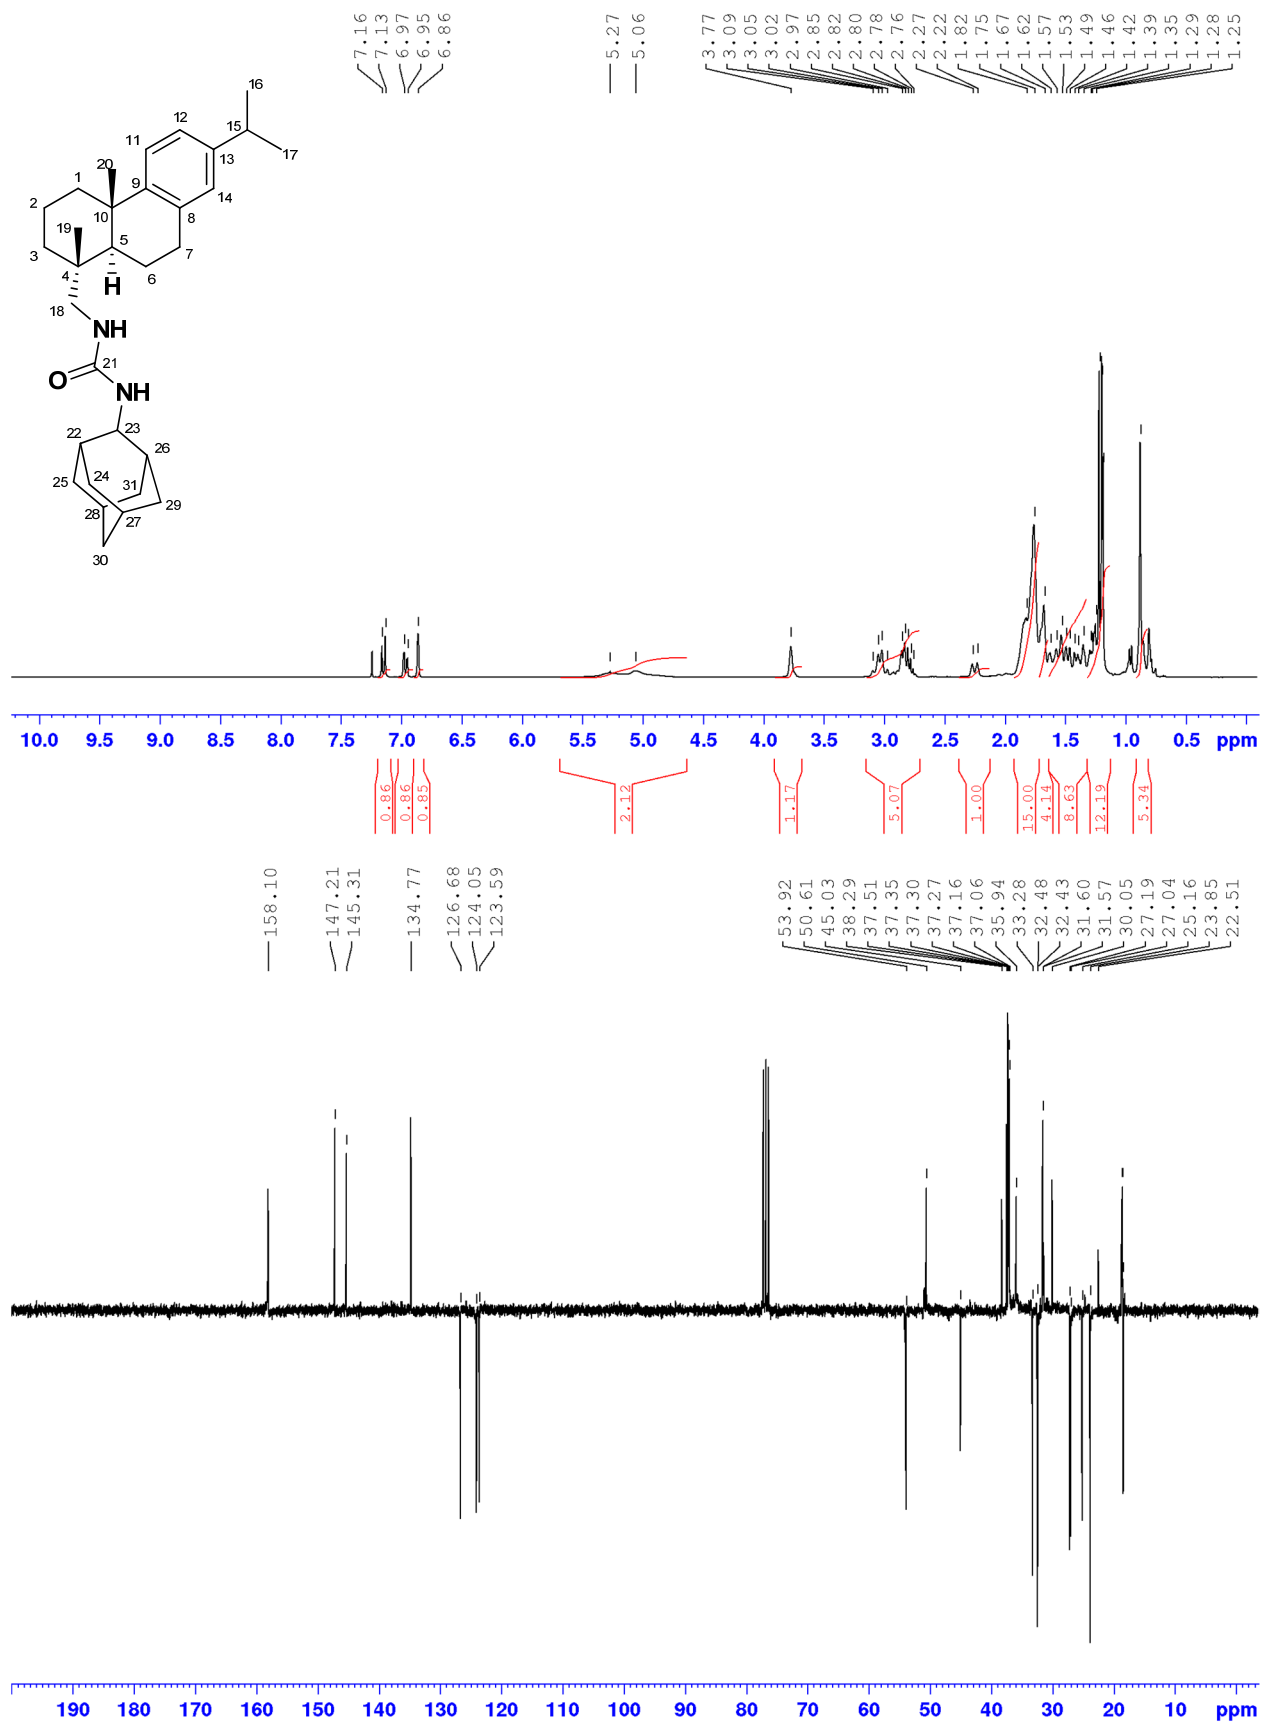

# <sup>1</sup>H and <sup>13</sup>C NMR spectra for compound 3

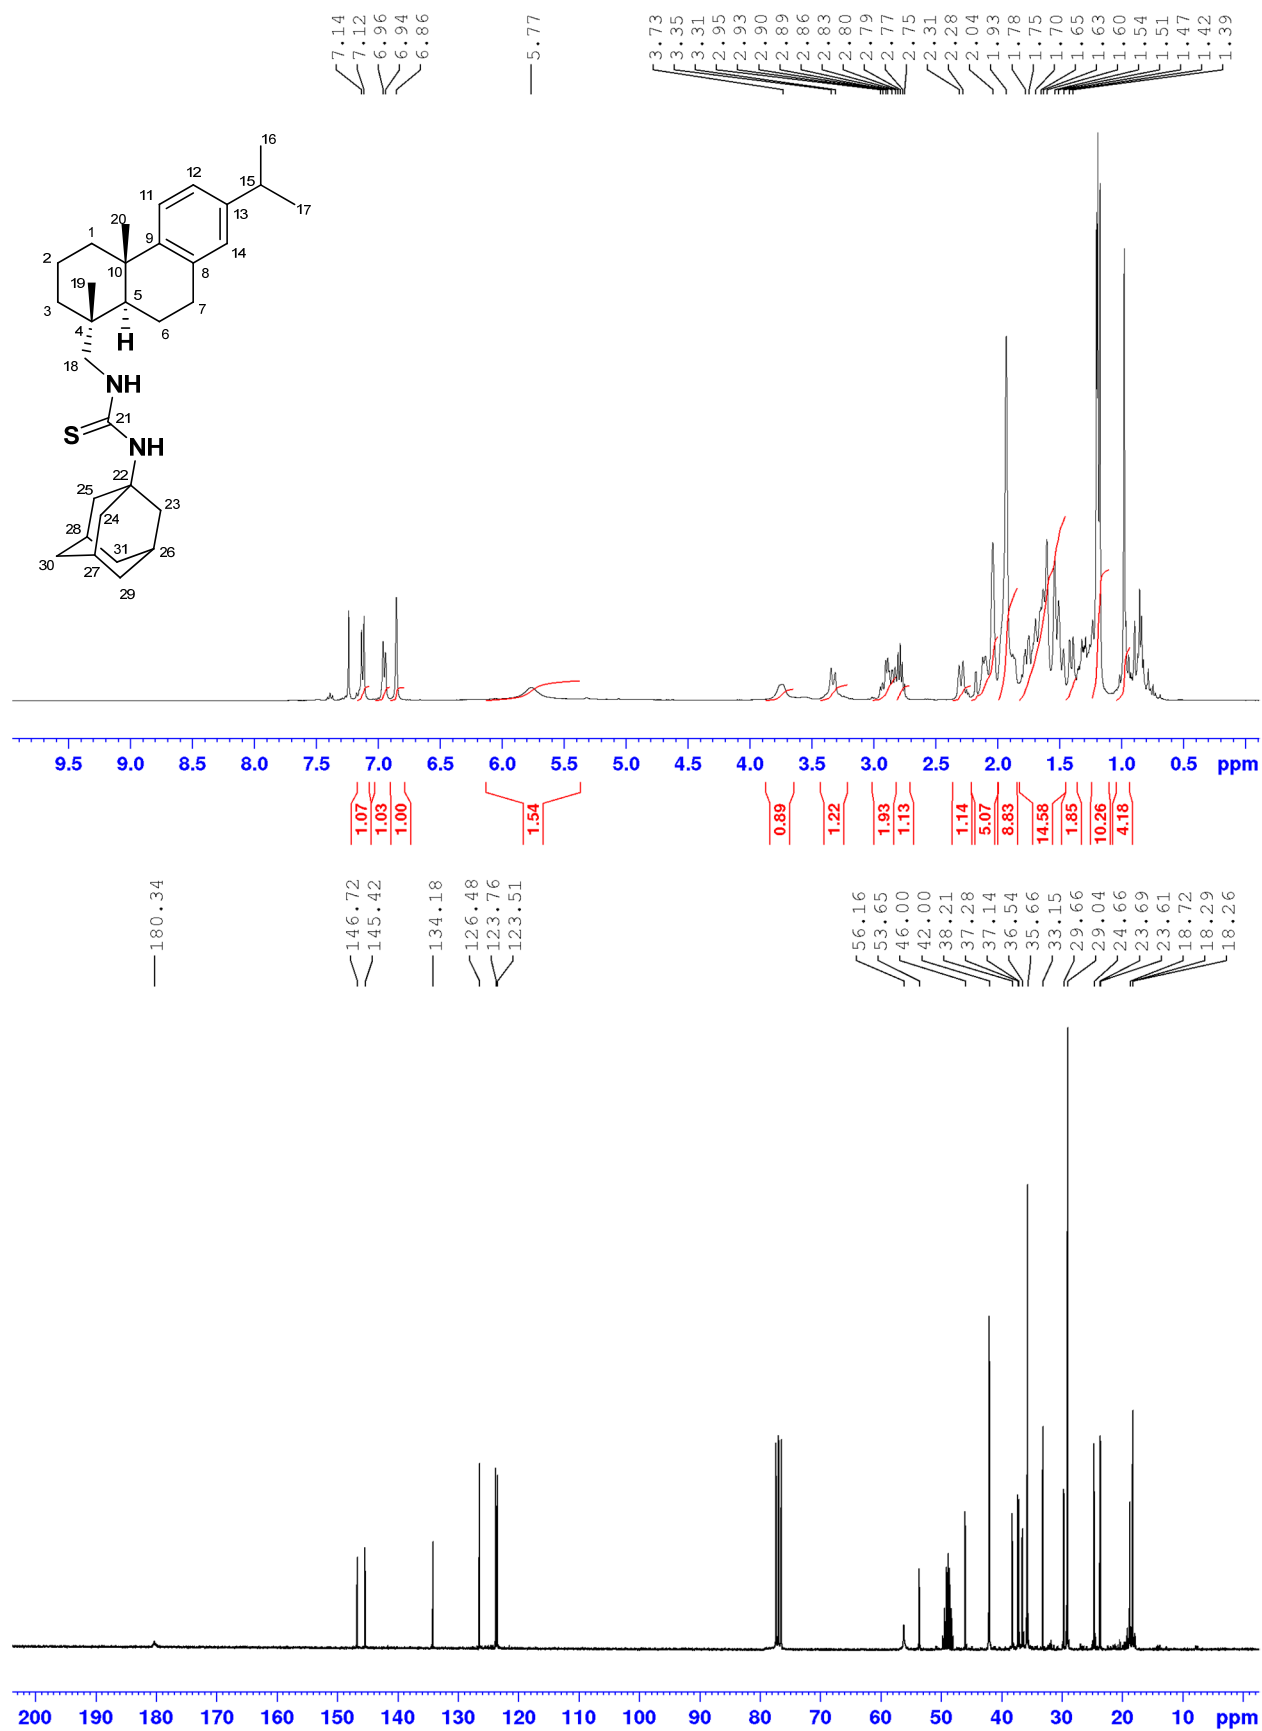

# <sup>1</sup>H and <sup>13</sup>C NMR spectra for compound 4

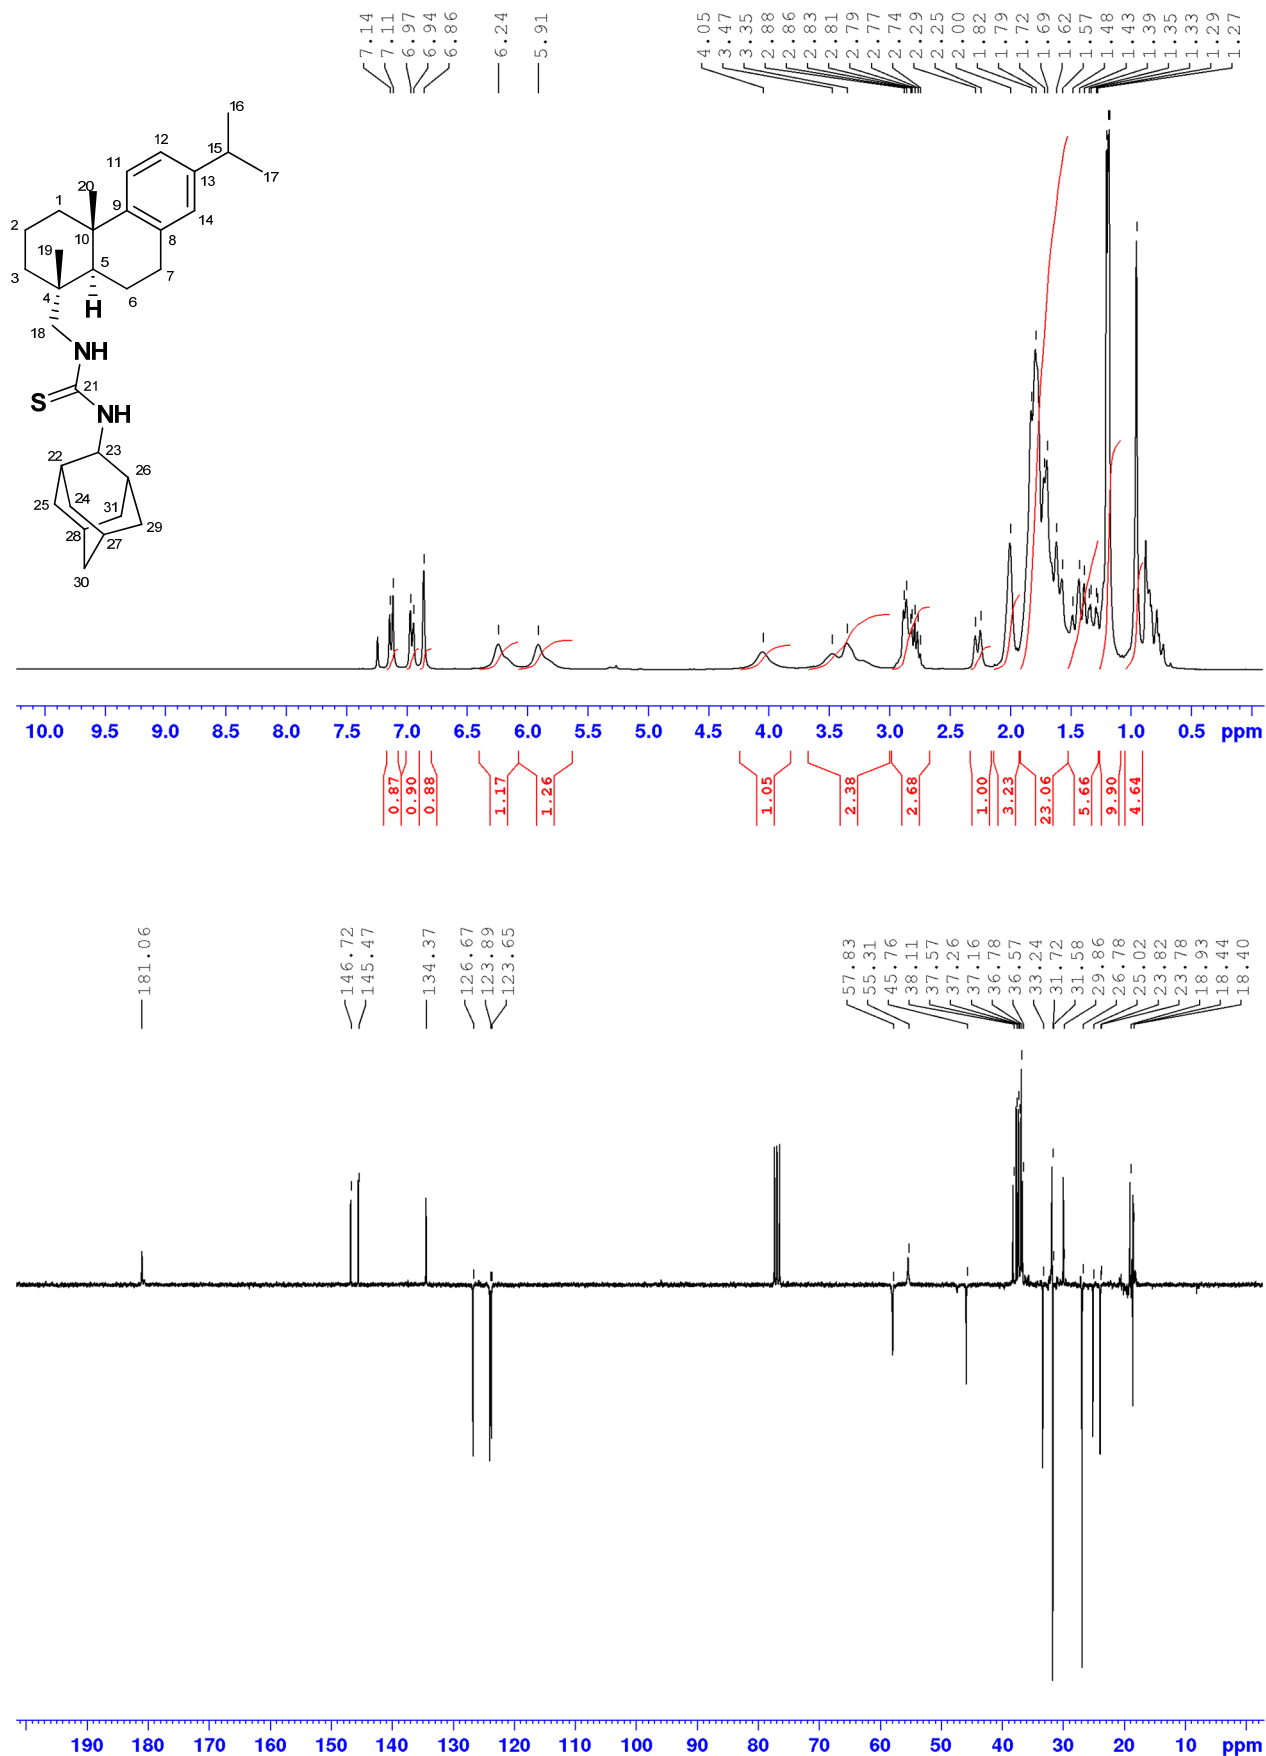

# <sup>1</sup>H and <sup>13</sup>C NMR spectra for compound 5

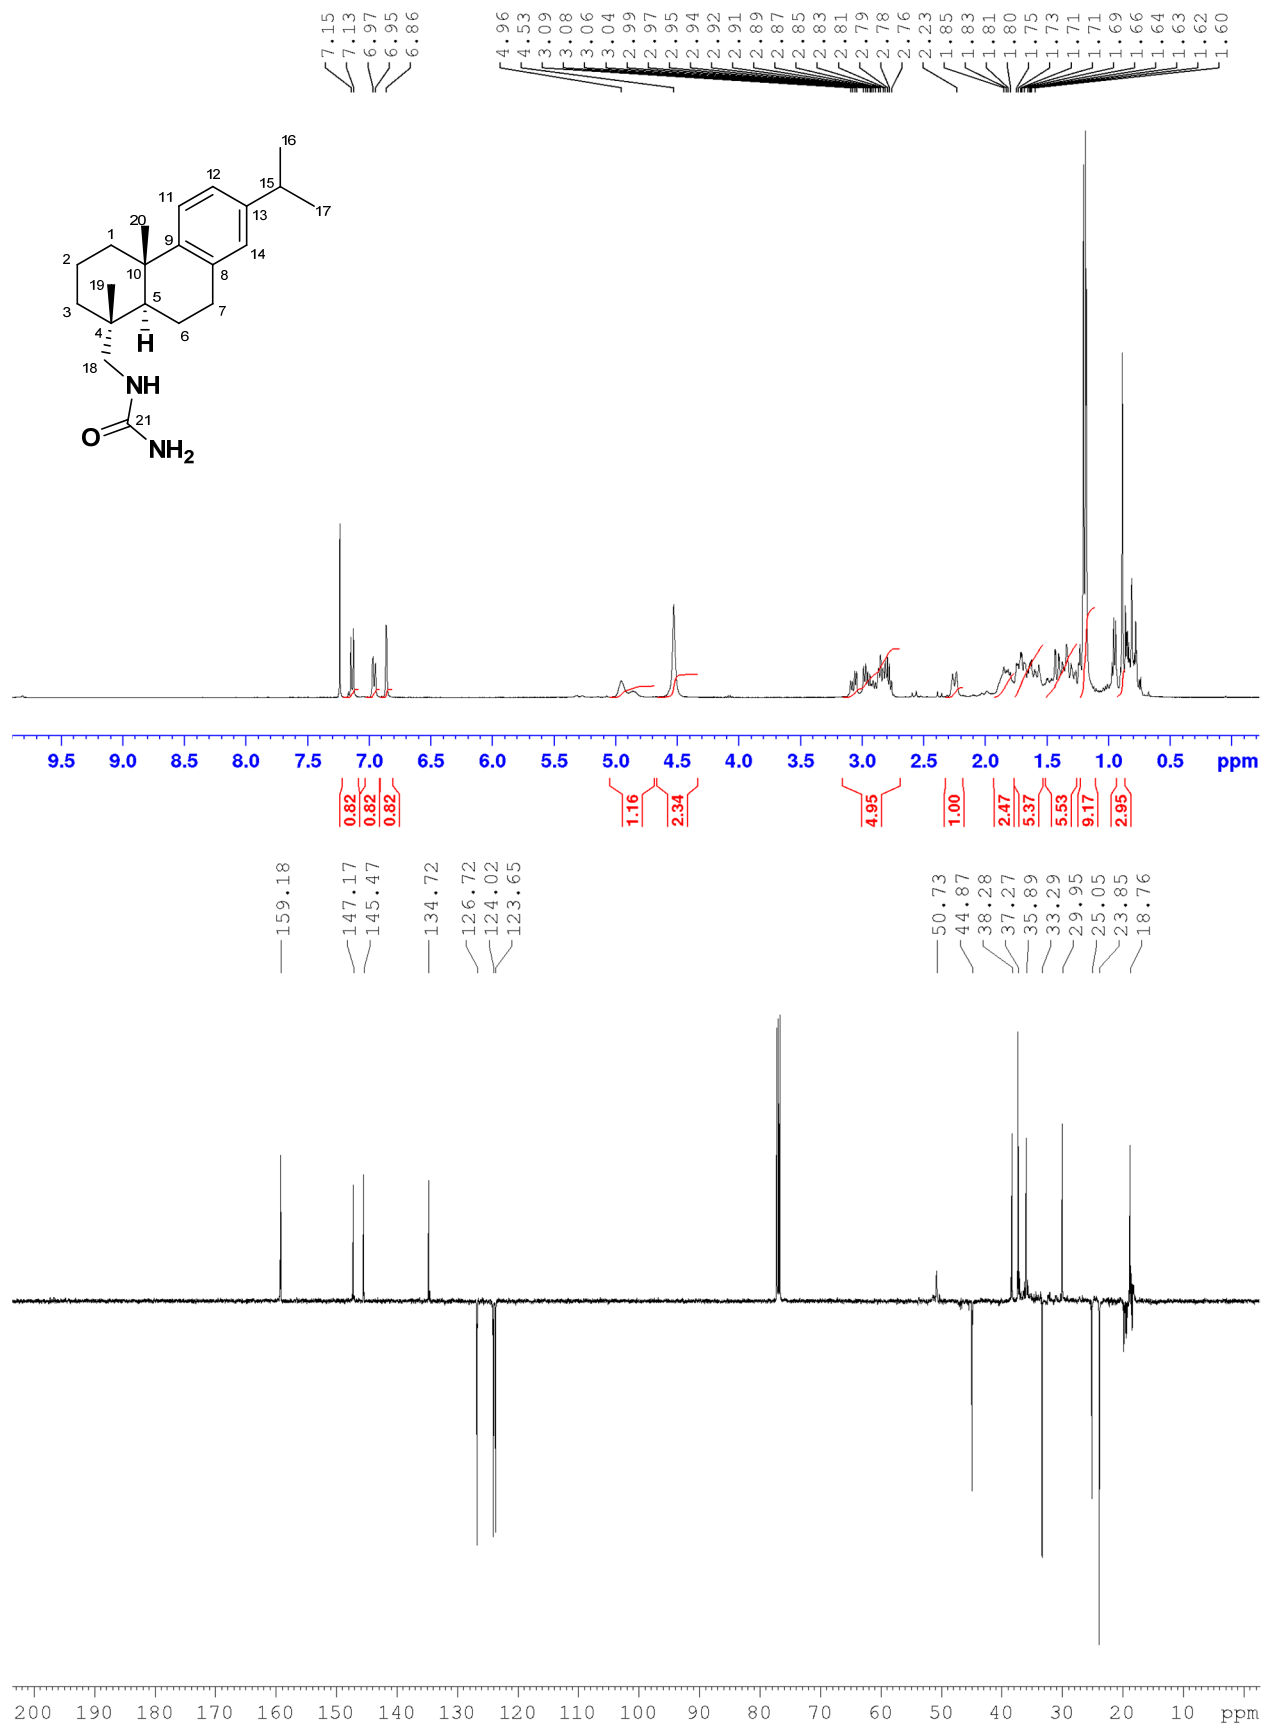

# <sup>1</sup>H and <sup>13</sup>C NMR spectra for compound 6

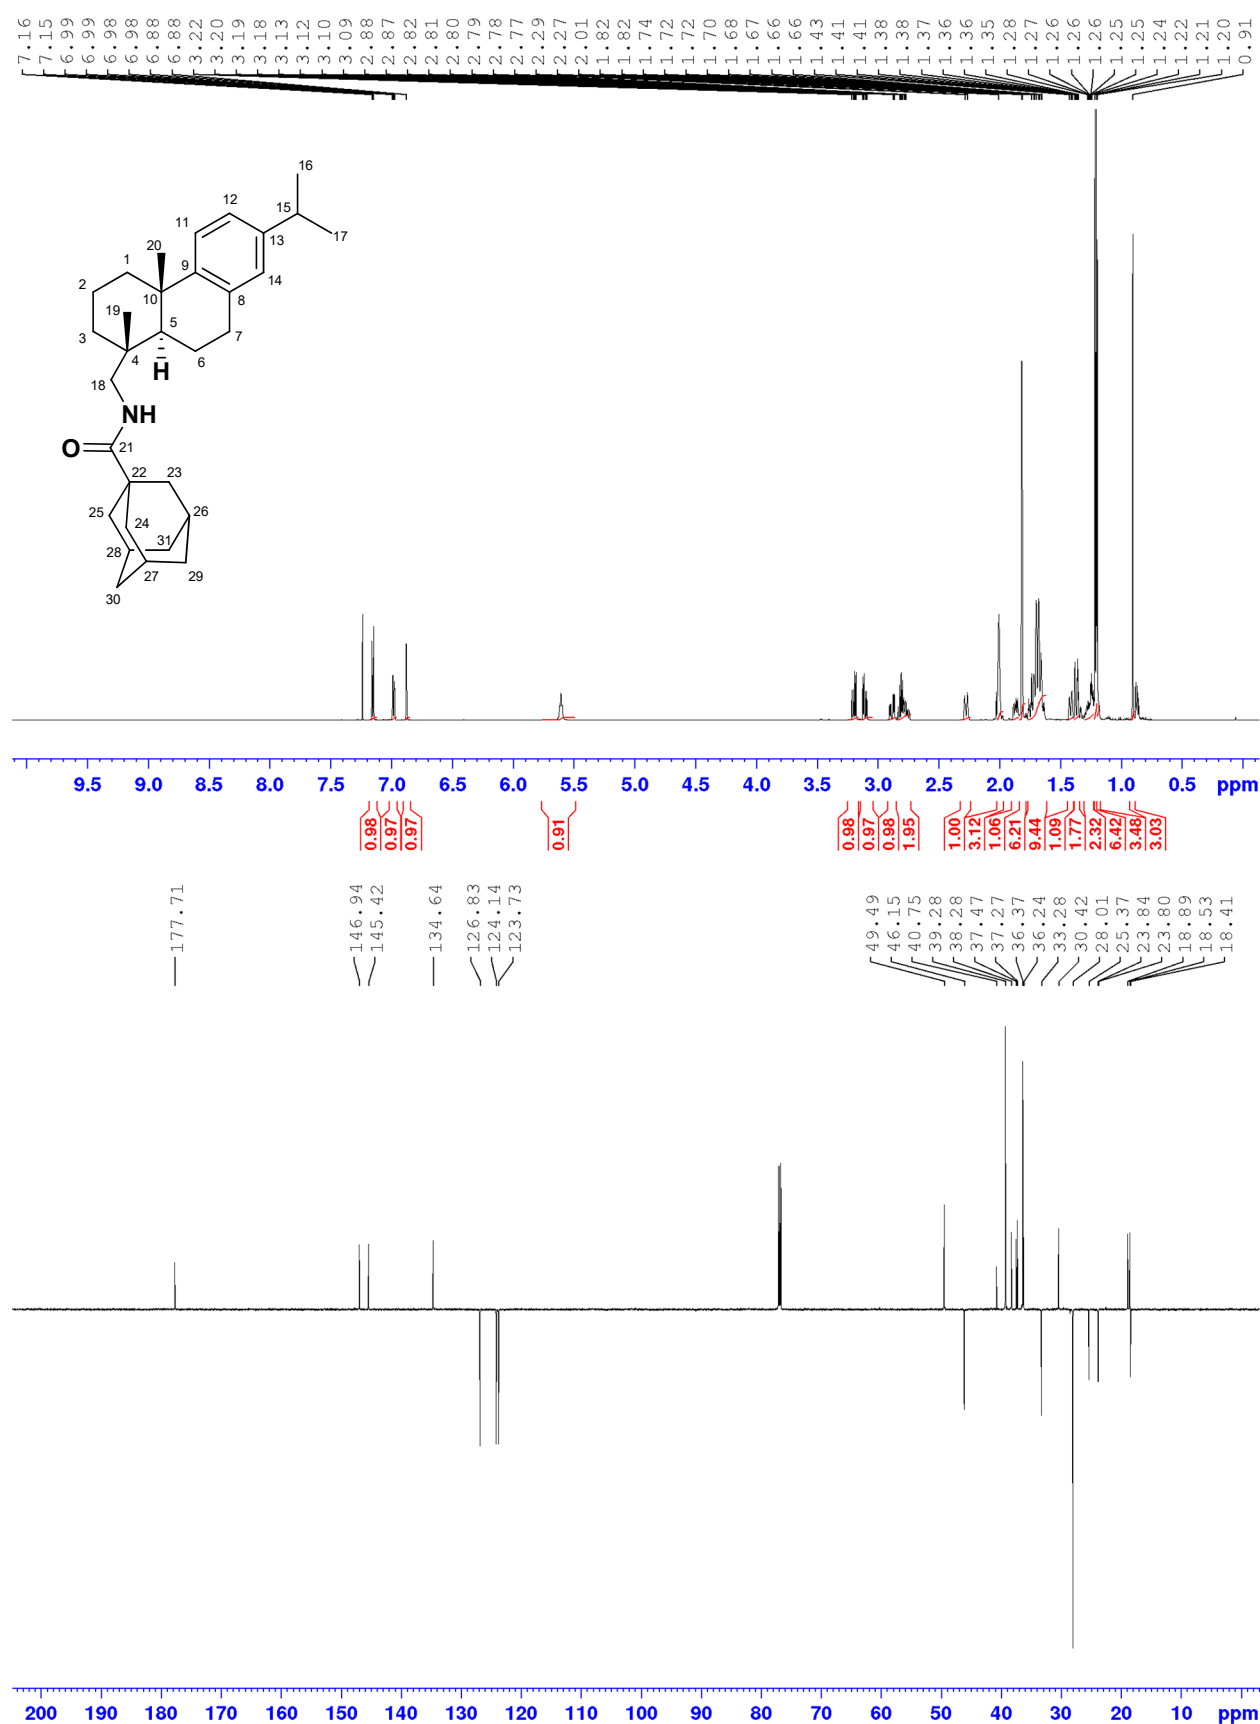

# <sup>1</sup>H and <sup>13</sup>C NMR spectra for compound 7

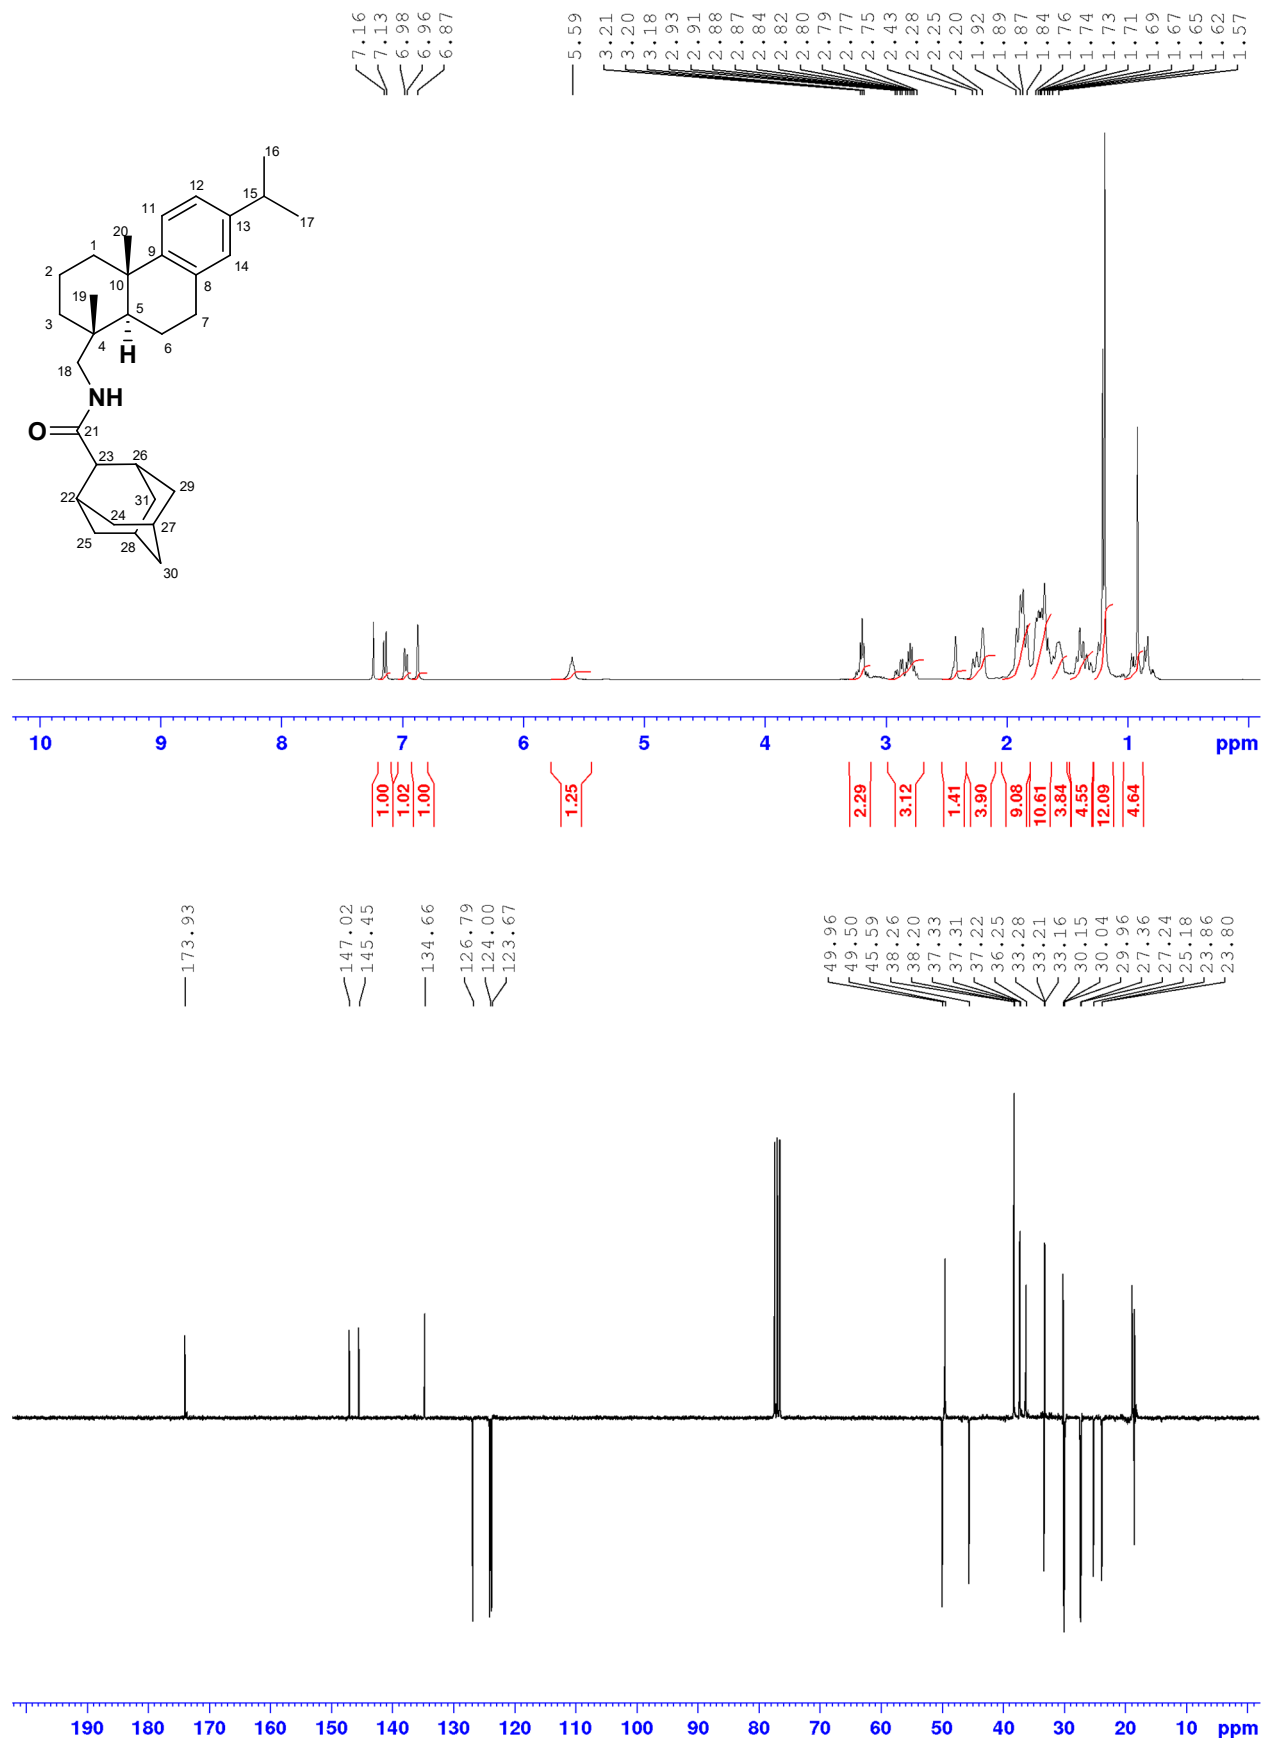

# <sup>1</sup>H and <sup>13</sup>C NMR spectra for compound 8

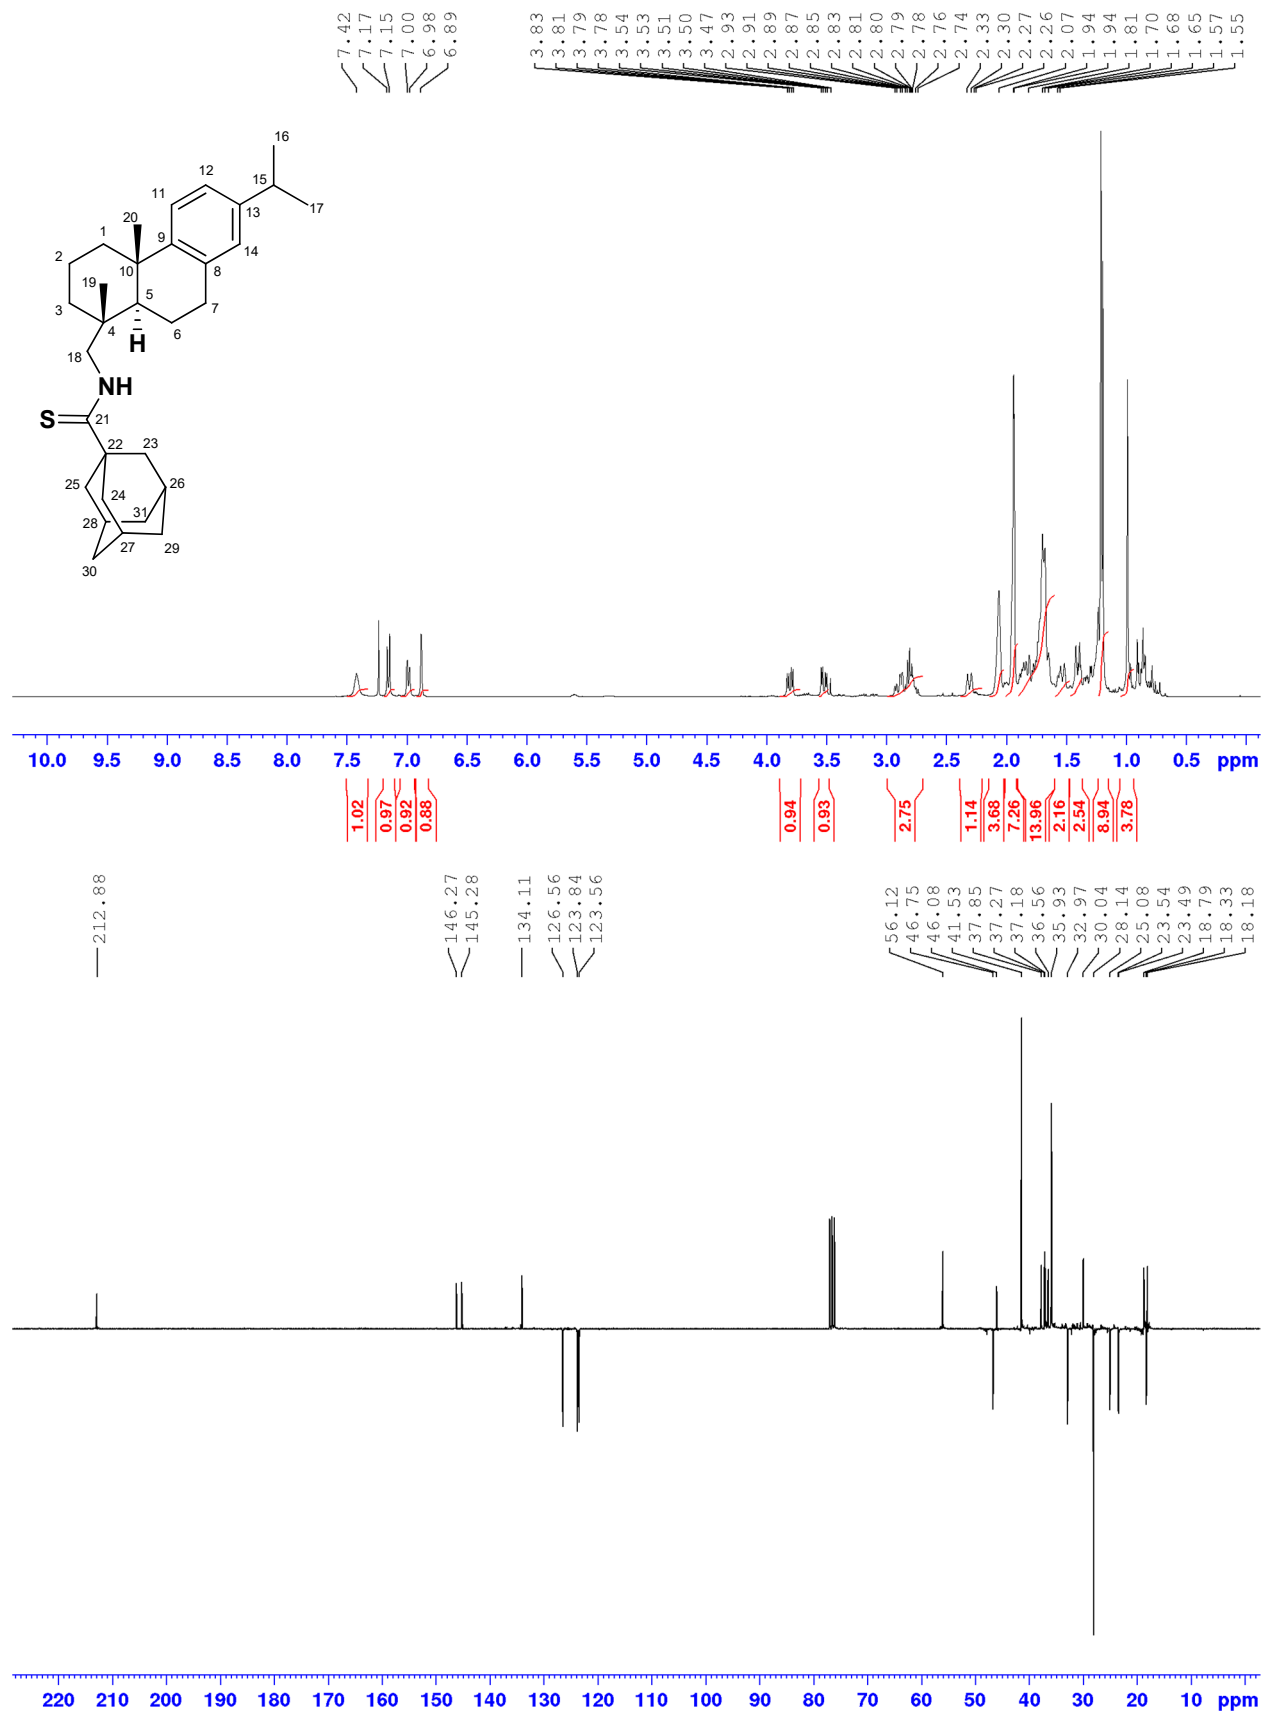

# $^1\text{H}$ and $^{13}\text{C}$ NMR spectra for norabietyl isocyanate

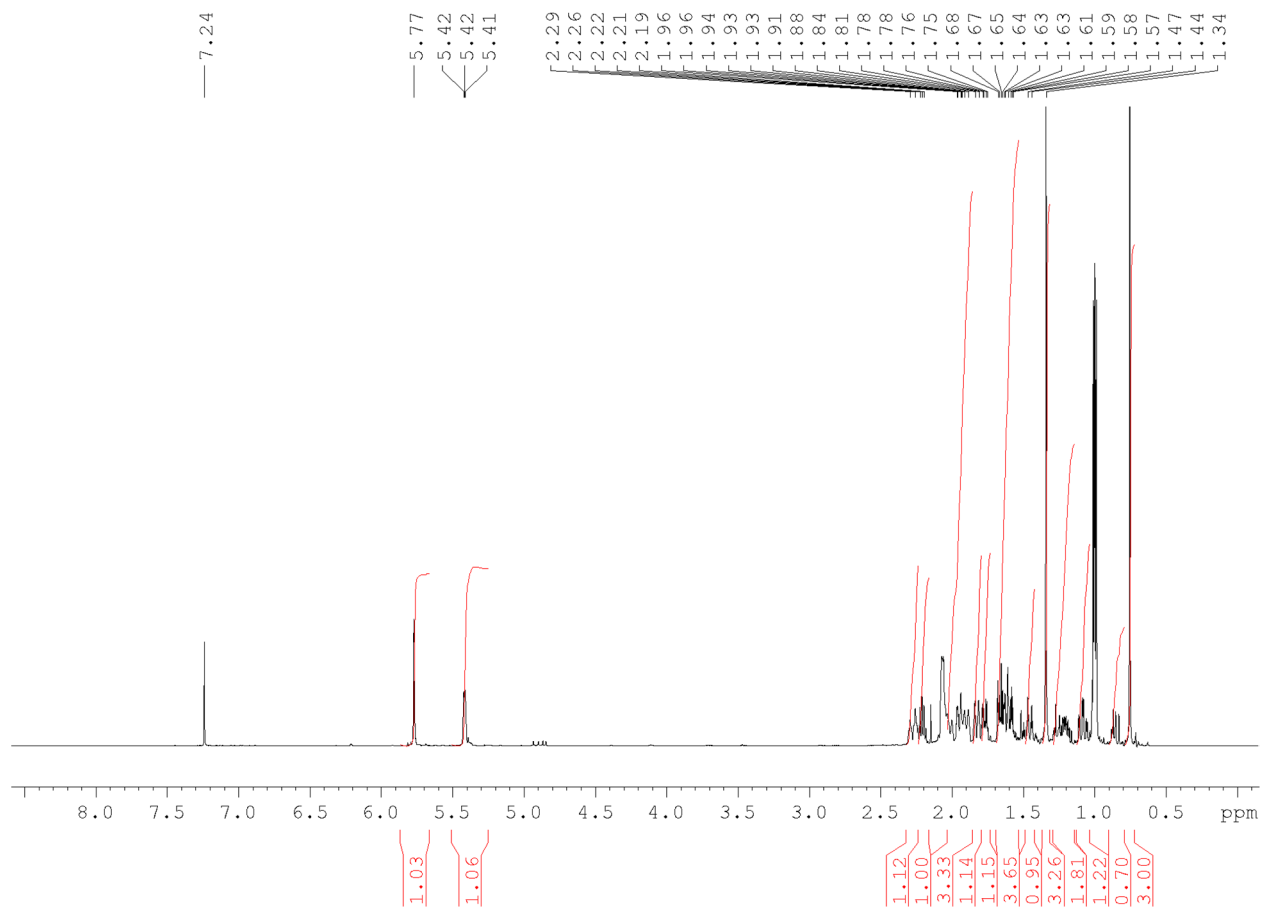



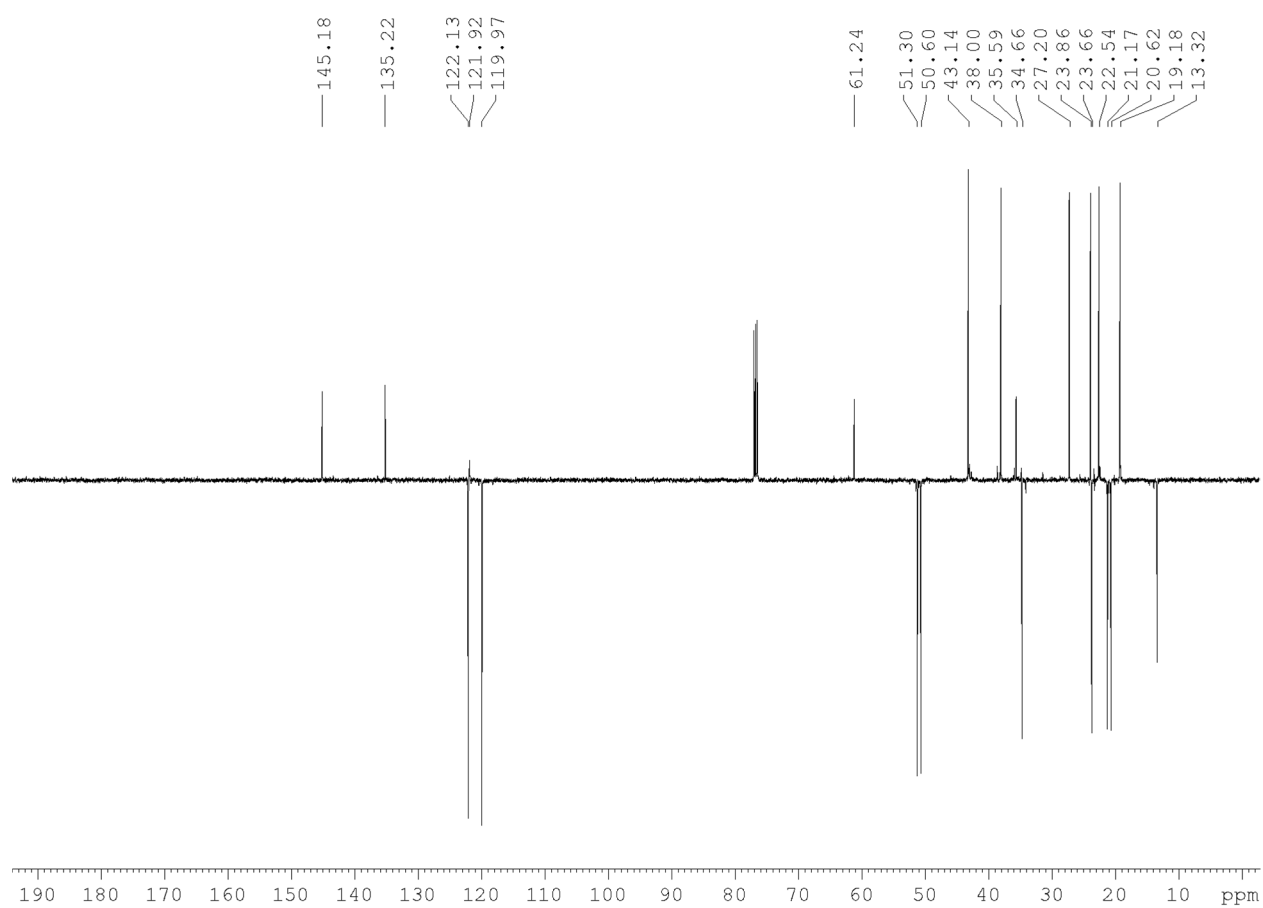

**<sup>1</sup>H and <sup>13</sup>C NMR spectra for compound 9**

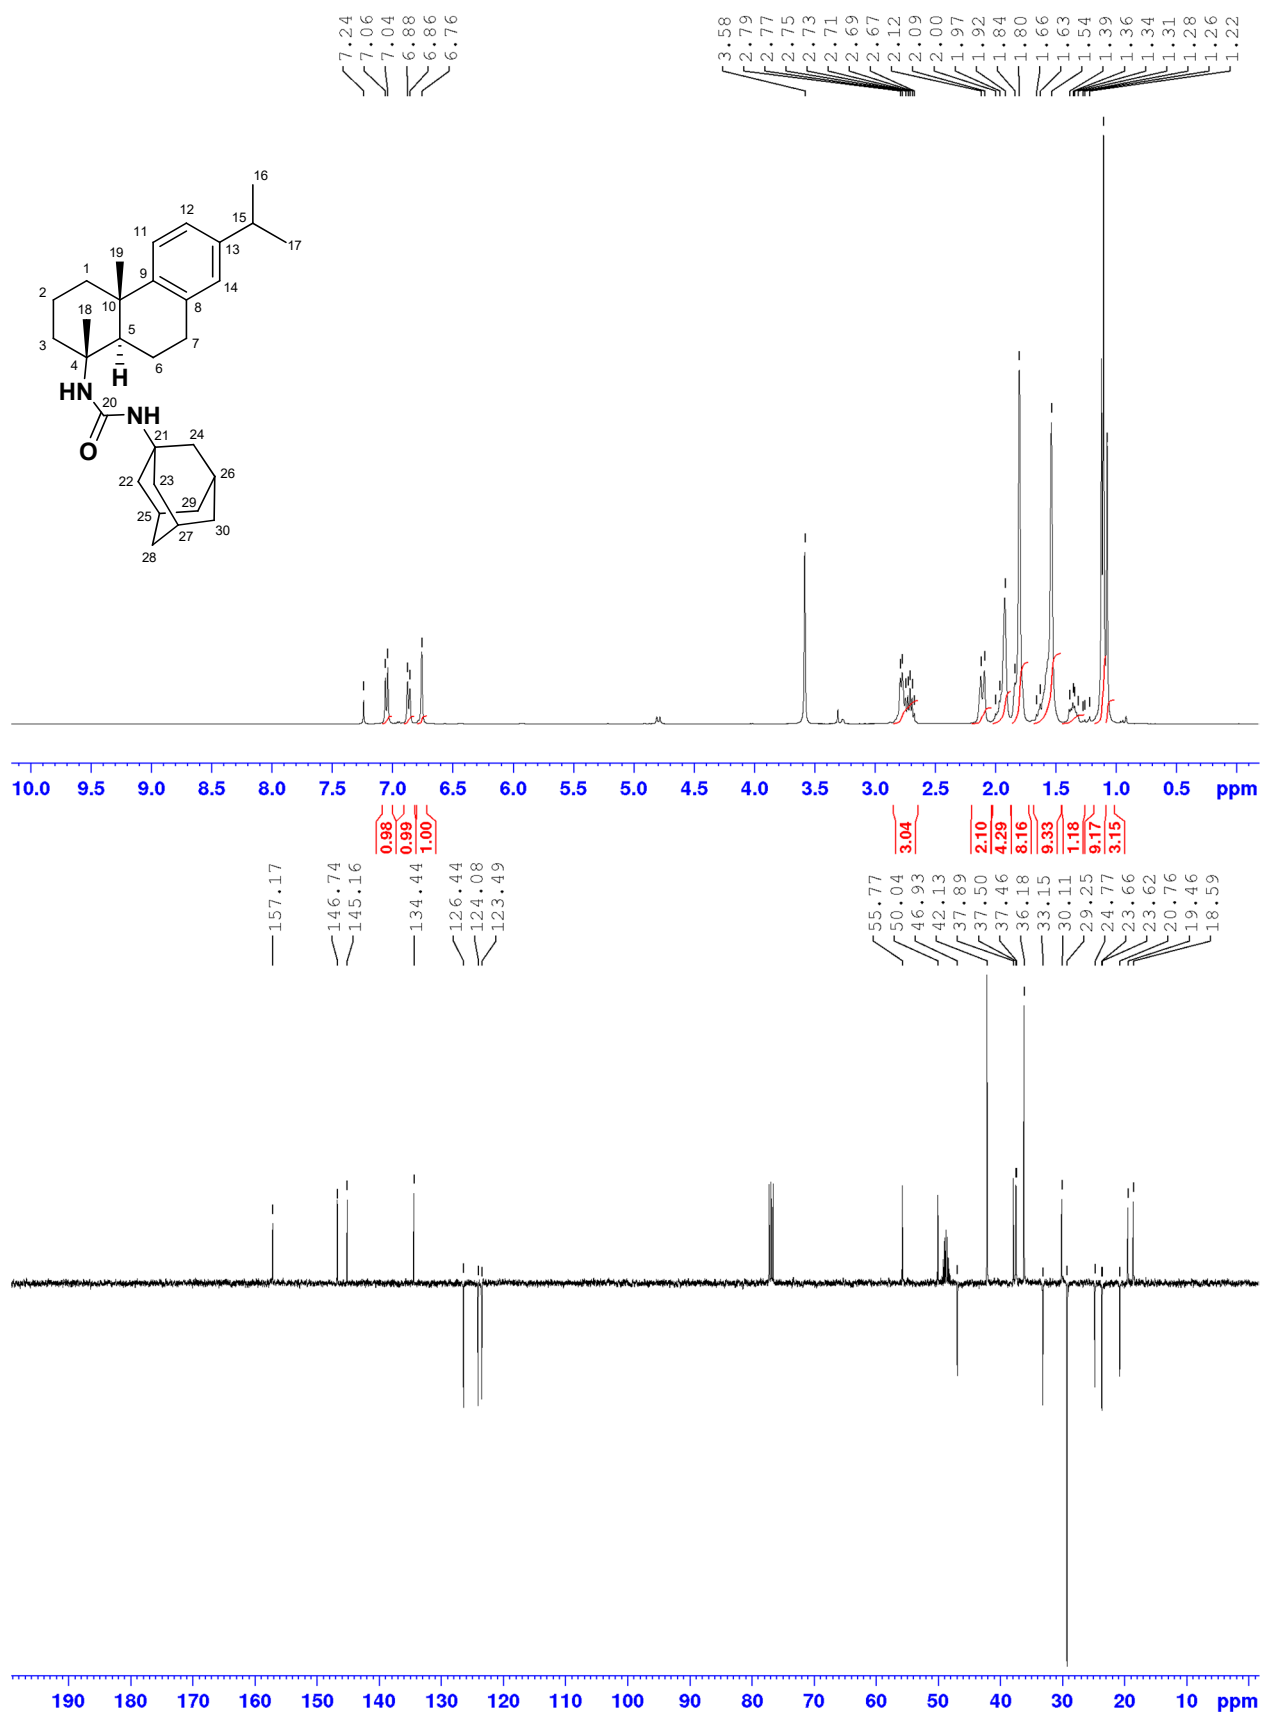

**<sup>1</sup>H and <sup>13</sup>C NMR spectra for compound 10**

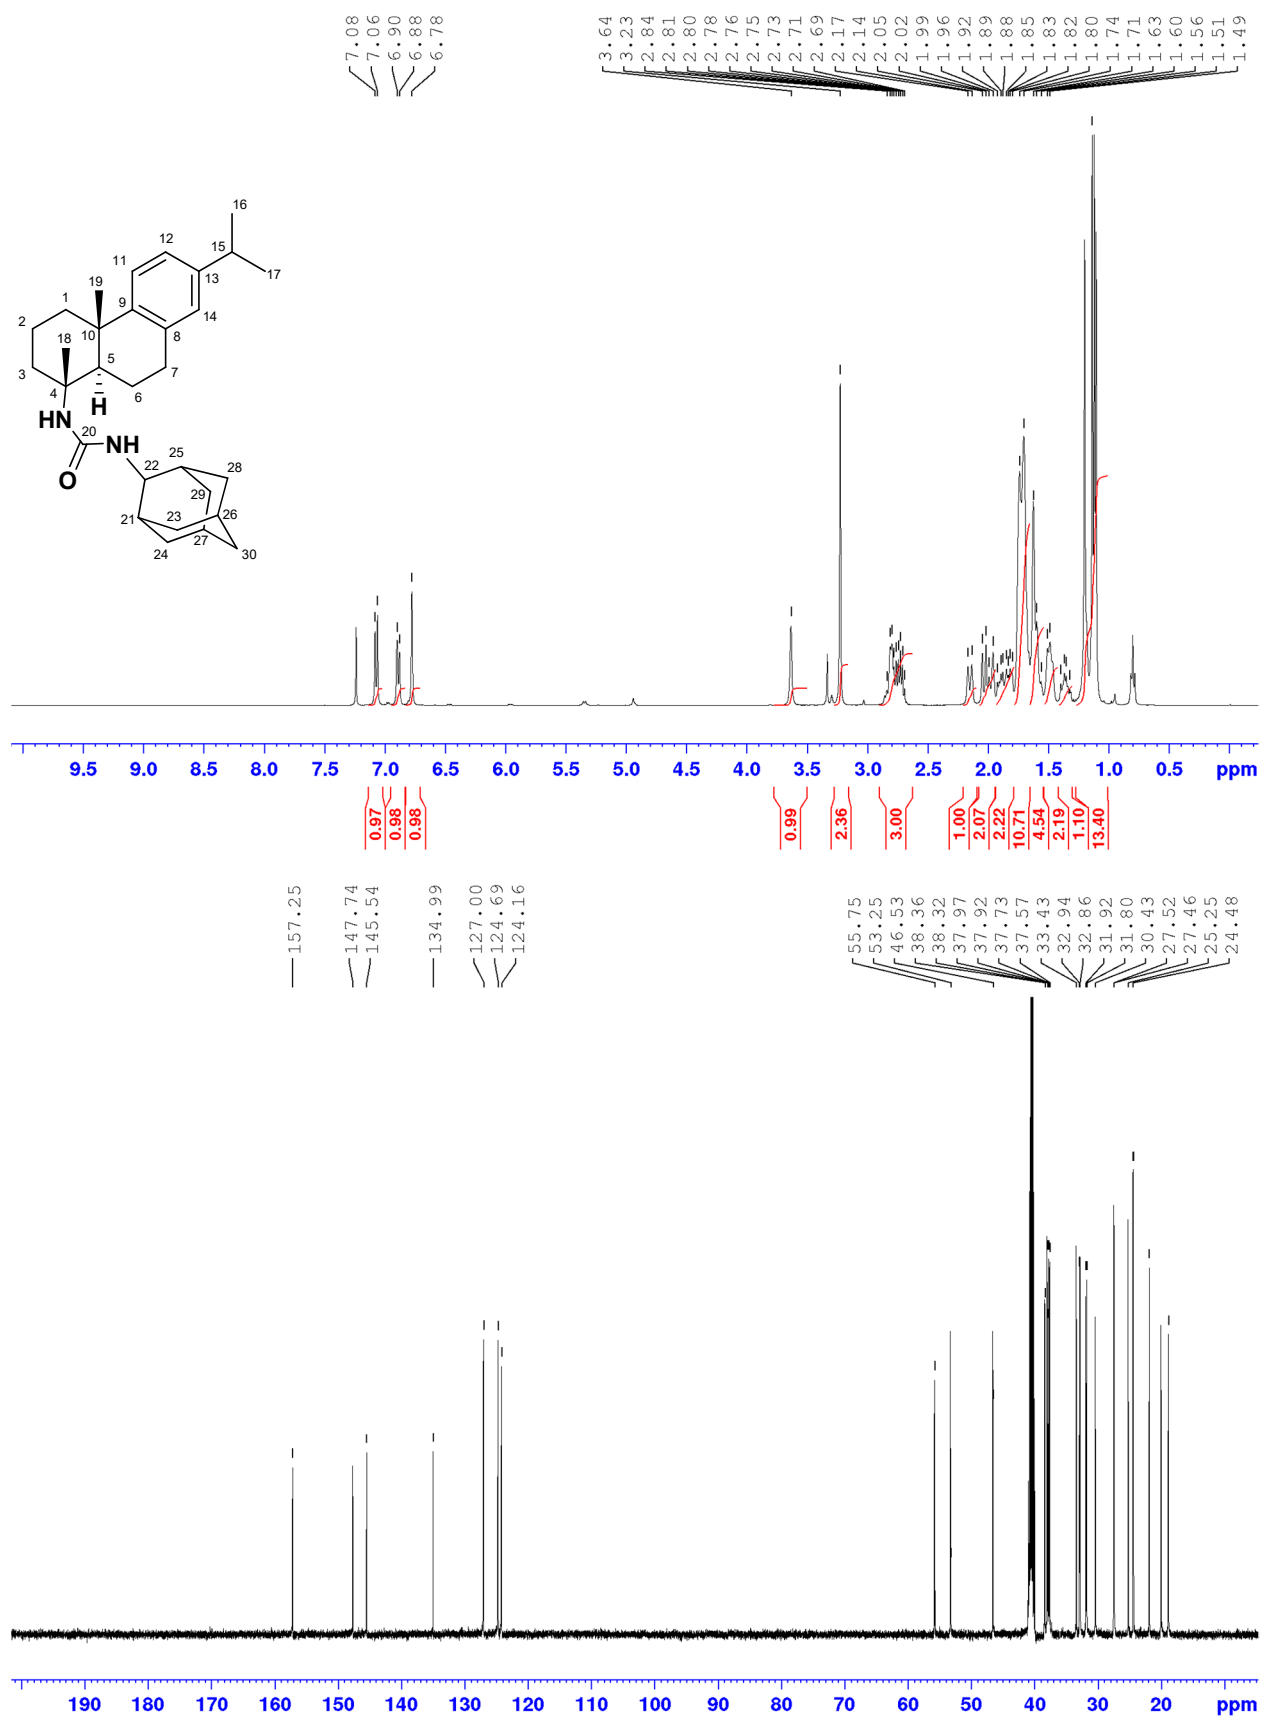

**<sup>1</sup>H and <sup>13</sup>C NMR spectra for compound 11**

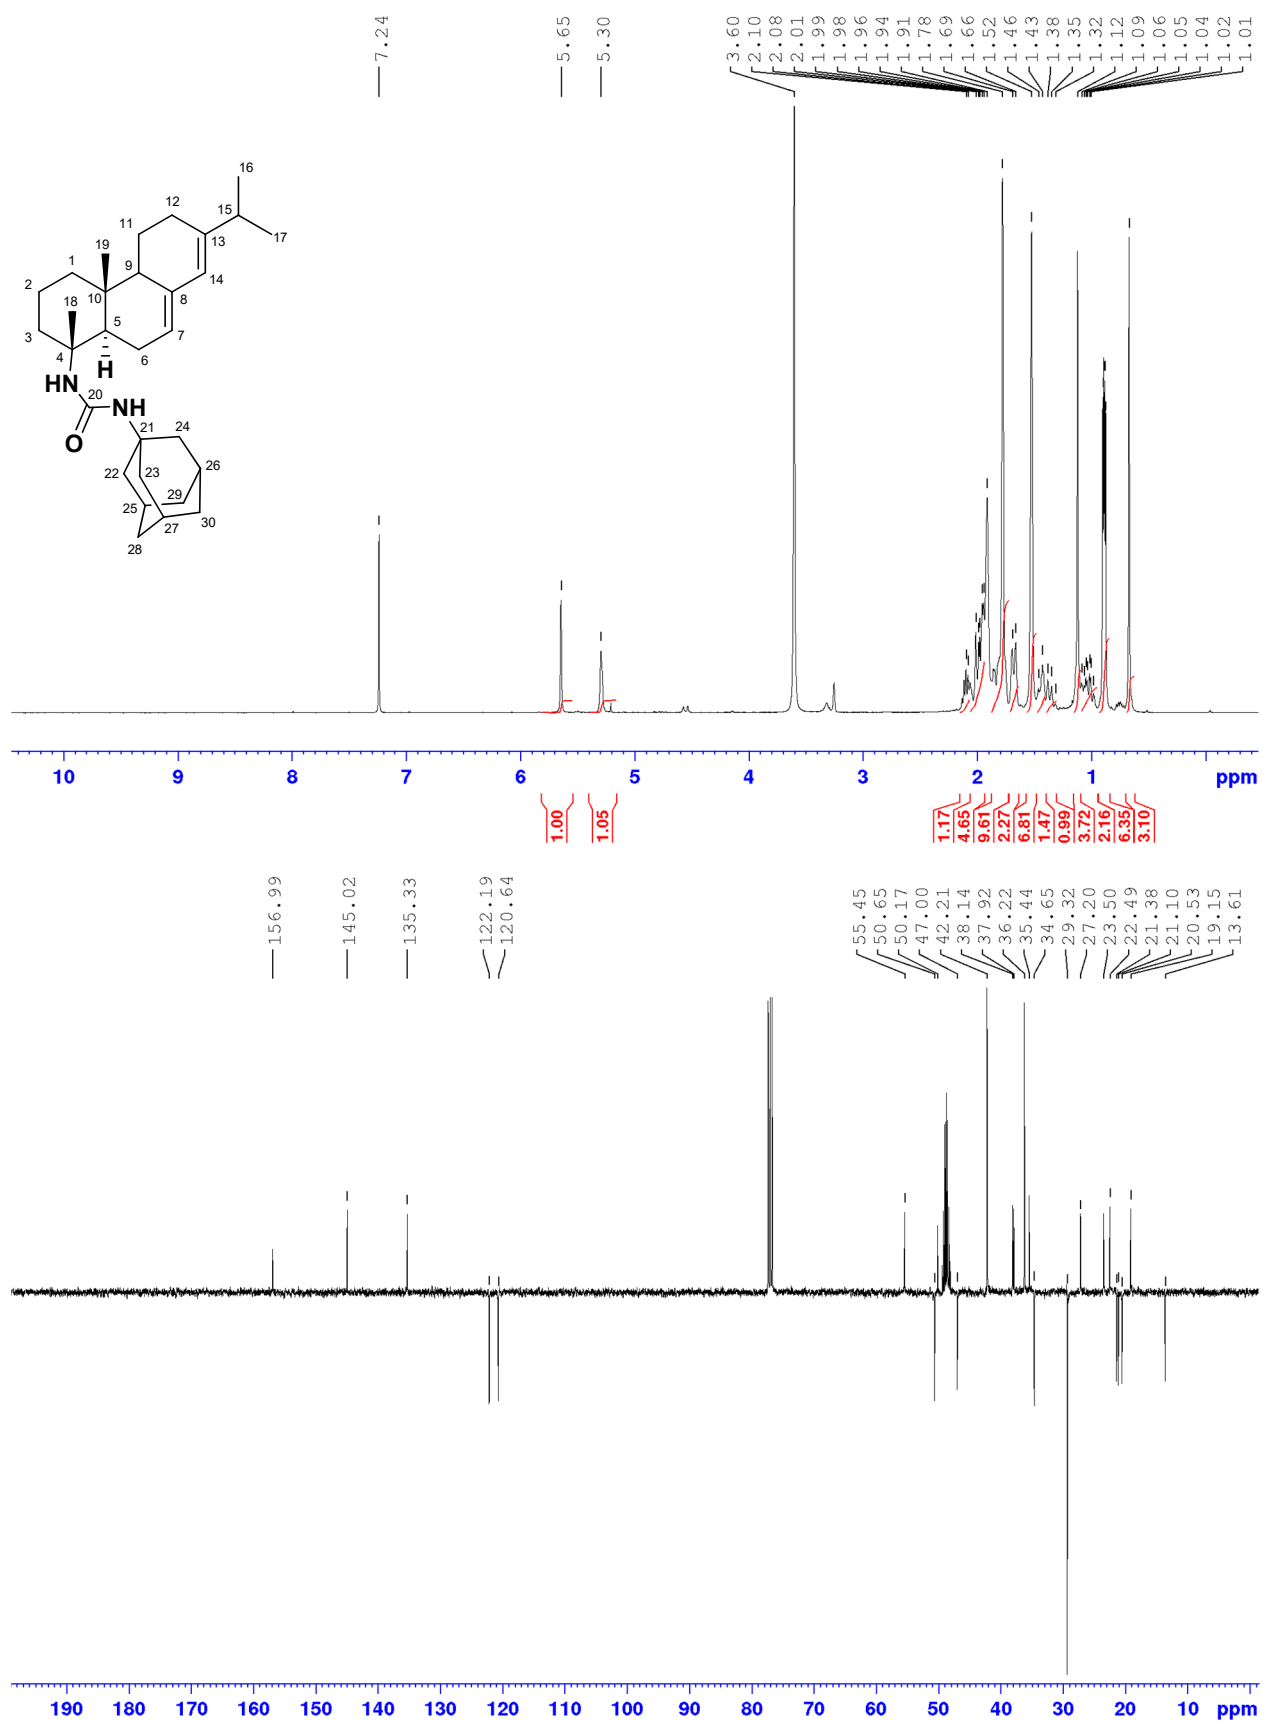

$^1\text{H}$  and  $^{13}\text{C}$  NMR spectra for compound 12

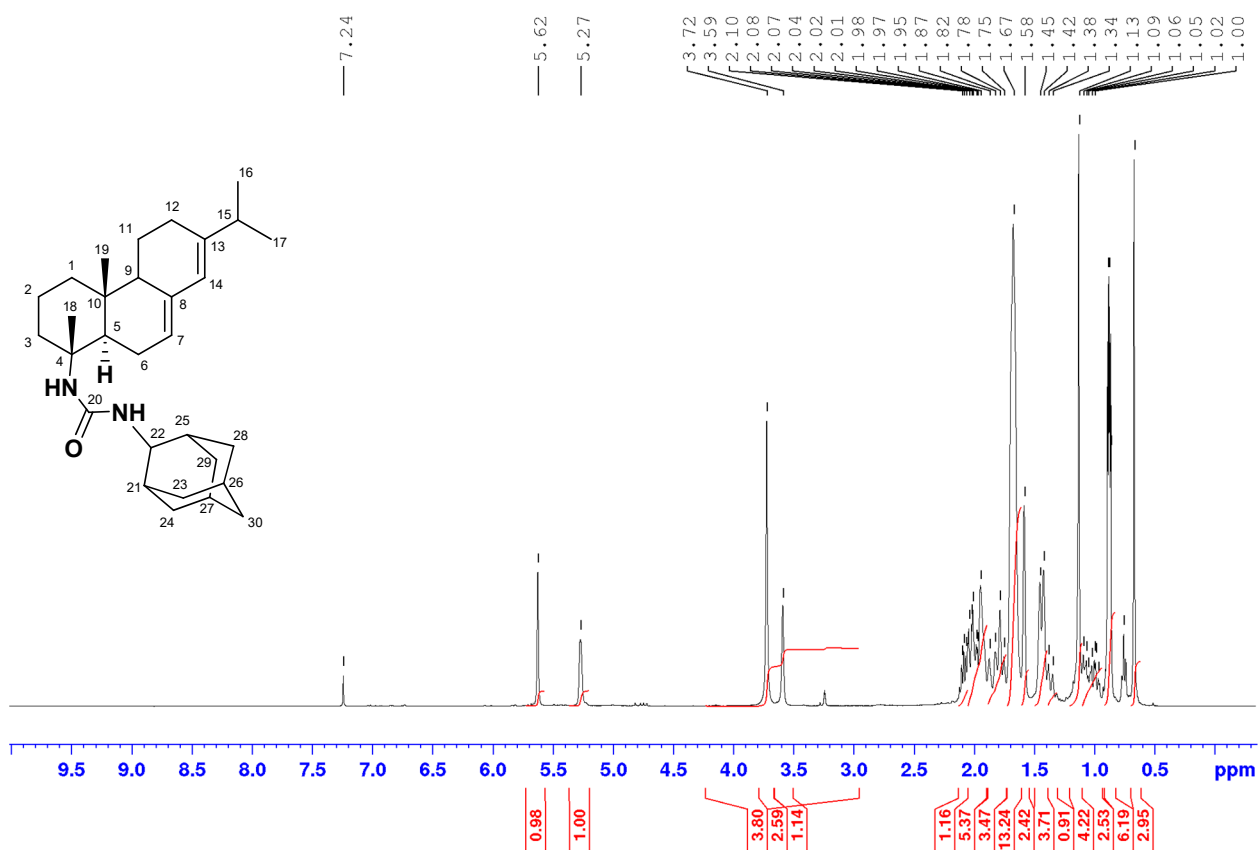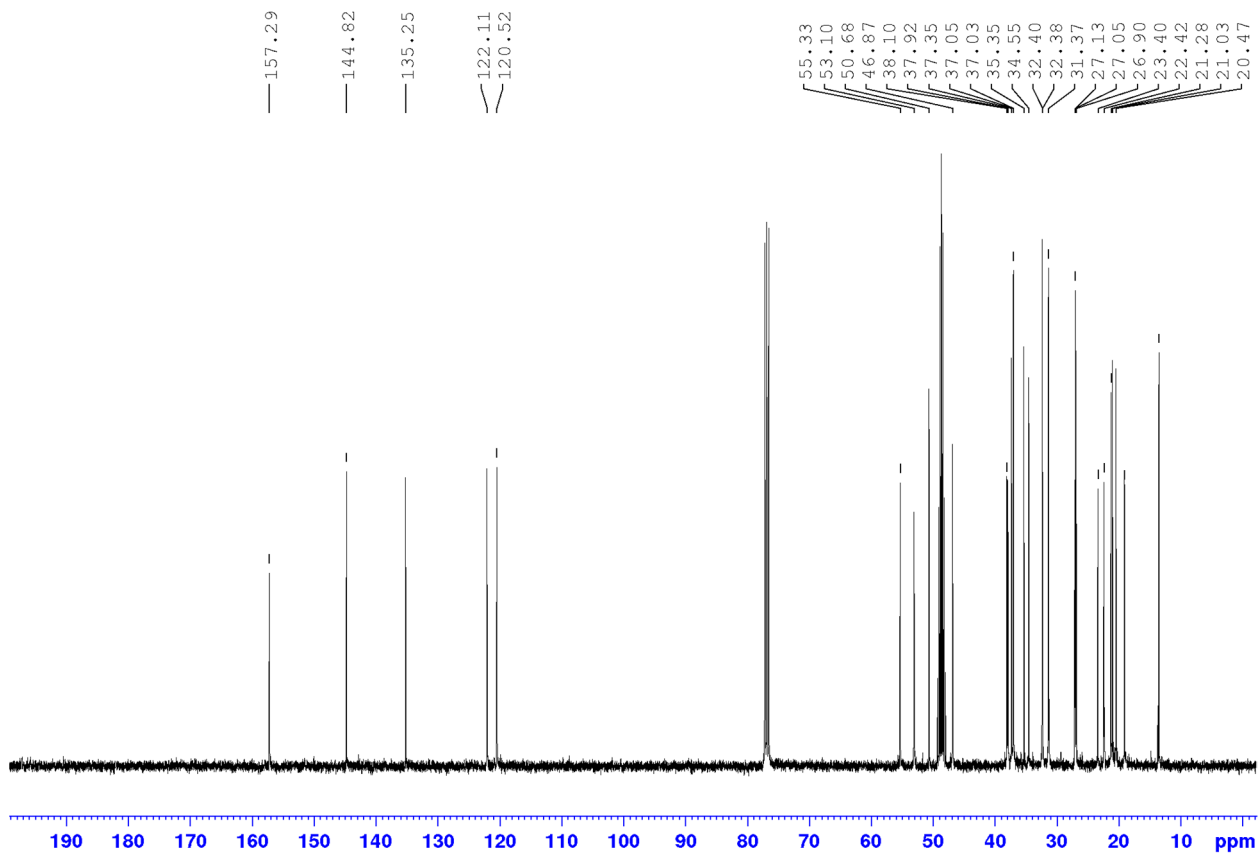

**Table S1.** LogP values for adamantane derivatives predicted with GALAS algorithm (implemented in the ACD/Percepta software, [www.acdlabs.com](http://www.acdlabs.com)), and the corresponding rate of brain penetration (LogPS) and extent of brain penetration (LogBB) calculated using LogP, molecular size, and H-bonding parameters as inputs. LogPS varies from -2.2 to -1.4 and LogBB from 0.2 to 0.48, which is suitable for penetrating into the central nervous system.

| Compound | LogP <sup>GALAS</sup> | LogPS                                                                             | LogBB                                                                               |
|----------|-----------------------|-----------------------------------------------------------------------------------|-------------------------------------------------------------------------------------|
|          |                       |  |  |
| 1        | 7.50                  | -2.1                                                                              | 0.24                                                                                |
| 2        | 7.31                  | -1.9                                                                              | 0.20                                                                                |
| 3        | 7.60                  | -2.0                                                                              | 0.30                                                                                |
| 4        | 7.38                  | -1.9                                                                              | 0.27                                                                                |
| 6        | 7.48                  | -1.8                                                                              | 0.48                                                                                |
| 7        | 7.34                  | -1.7                                                                              | 0.48                                                                                |
| 8        | 8.28                  | -2.2                                                                              | 0.29                                                                                |
| 9        | 7.19                  | -1.8                                                                              | 0.30                                                                                |
| 10       | 7.27                  | -1.9                                                                              | 0.29                                                                                |
| 11       | 6.72                  | -1.6                                                                              | 0.47                                                                                |
| 12       | 6.30                  | -1.4                                                                              | 0.29                                                                                |
